# Supplementary material for: Borohydride stabilized gold–silver bimetallic nanocatalysts for highly efficient 4-nitrophenol reduction
Source: Royal Society of Chemistry journal article supplement (doi:10.1039/c9na00645a), 2019-01-01
Supplement: c9na00645a1.pdf [file c9na00645a1.pdf]

## Electronic Supplementary Information

### Borohydride stabilized gold-silver bimetallic nanocatalysts for highly efficient 4-nitrophenol reduction

Nathaniel E. Larm, Jason A. Thon, Yahor Vazmitsel, Jerry L. Atwood, and Gary A. Baker\*

#### Experimental Section

**Materials.** Ultrapure Millipore water purified to a resistivity of 18.2 MΩ cm was used throughout. Tetrachloroauric acid trihydrate ( $\text{HAuCl}_4 \cdot 3 \text{H}_2\text{O}$ ,  $\geq 99.9\%$ , 520918), silver nitrate ( $\text{AgNO}_3$ , 99.9999%, 204390), sodium borohydride ( $\text{NaBH}_4$ , 99.99%, 480886), and 4-nitrophenol (4-NP,  $\geq 99\%$ , 241326) were all acquired from Millipore Sigma (St. Louis, MO) and used as received.

**Characterization.** UV–vis spectroscopy was performed using a Cary 50 Bio UV–vis spectrometer with disposable, 1-cm path length poly(methyl methacrylate) (PMMA) cuvettes. Transmission electron microscopy (TEM) images of 5-day-old NPs deposited on carbon-coated copper grids (Ted Pella, Inc.; 01814-F, support films, carbon type-B, 400 mesh) were obtained using an FEI Technai (F20) microscope operating at 200 keV. At least 300 particles were analyzed using ImageJ software to generate NP size histograms.

**Nanocatalyst Synthesis.** 18.0 mL of ultrapure  $\text{H}_2\text{O}$  was added to each of thirty-three 50-mL polypropylene centrifuge tubes. The appropriate volume of 5.0 mM  $\text{HAuCl}_4 \cdot 3\text{H}_2\text{O}$  was added to each tube according to the experimental parameters given in Tables S1–S3. 10.0, 25.0, and 50.0 mM  $\text{NaBH}_4$  solutions were prepared immediately before use. Two 1000-μL autopipettors were used to rapidly and simultaneously inject the appropriate amounts of 5.0 mM  $\text{AgNO}_3$  and  $\text{NaBH}_4$  stock to the  $\text{HAuCl}_4$  solution under vortex mixing, achieving a  $\text{BH}_4^-$  to metal molar ratio of 2.0, 5.0, or 10.0 based on the sample set in Tables S1–S3. The resulting solutions, which immediately turned a shade of red to yellow depending on the metal ratio, were vortexed for an additional 20 s to mix. UV–vis absorption spectroscopy was used to follow the colloidal stability of the nanoparticles during aging for 1, 5, 10, 20, and 30 d. All solutions were kept at room temperature and stored protected from light during aging.

**Nitroarene Reduction.** The catalytic activity for 4-nitrophenol (4-NP) reduction to 4-aminophenol (4-AP) using  $\text{NaBH}_4$  was assessed for each sample that did not visibly show black aggregates after aging for 5 d. First, 2.1 mL of 0.20 mM 4-NP and 0.9 mL of fresh 0.1 M  $\text{NaBH}_4$  were combined in a clean 4-mL PMMA cuvette and placed in the UV–vis spectrometer set to scan at 400 nm. To initiate a catalytic run, 0.034 mL of a given nanoparticle solution (0.25 mM metal) was added, followed by rapid capping and inversion of the cuvette to mix before placing it in the spectrometer. The reaction was assumed to have completed when the absorbance at 400 nm was at 5% of the starting value. For a large excess of borohydride ( $\text{NaBH}_4$ :4-NP ratio of 214

was used throughout), the pseudo-first-order kinetics yield a linear plot of  $\ln(A_0/A_t)$  versus time, where  $A_0$  and  $A_t$  are the initial and time-dependent absorbance, respectively, with the slope equaling the apparent rate ( $k_{app}$ ). All kinetic studies were performed in triplicate.

**Evaluation of Economics.** At the time of this writing, 1 g of  $\text{AgNO}_3$  costs \$24.70 (99.9999% trace metals basis, 204390) whereas 1 g of  $\text{HAuCl}_4 \cdot 3\text{H}_2\text{O}$  runs \$127.00 (99.9% trace metals basis, 520918) from Millipore Sigma. Notably, the TOF/USD ratio increased over 85-fold between  $x = 1.0$  and  $x = 0.1$  for  $\text{Au}_x\text{Ag}_{1-x}$  NPs made for  $R = 5$ . Error bars were derived from the uncertainty in the TOF and do not account for price variability.

**Table S1**  $R = 2$  sample preparation for  $\text{Au}_x\text{Ag}_{1-x}$  NPs reduced and stabilized by  $\text{NaBH}_4$ .

| Stocks           | [stock]<br>(mM) | $x$ | Water<br>(mL) | $\text{HAuCl}_4$<br>stock (mL) | Total<br>(mL) | $\text{AgNO}_3$<br>stock (mL) | $\text{NaBH}_4$<br>stock (mL) | Final volume<br>(mL) |
|------------------|-----------------|-----|---------------|--------------------------------|---------------|-------------------------------|-------------------------------|----------------------|
| $\text{HAuCl}_4$ | 5.0             | 1.0 | 18.0          | 1.0                            | 19.0          | 0.0                           | 1.0                           | 20.0                 |
| $\text{AgNO}_3$  | 5.0             | 0.9 | 18.0          | 0.9                            | 18.9          | 0.1                           | 1.0                           | 20.0                 |
| $\text{NaBH}_4$  | 10.0            | 0.8 | 18.0          | 0.8                            | 18.8          | 0.2                           | 1.0                           | 20.0                 |
|                  |                 | 0.7 | 18.0          | 0.7                            | 18.7          | 0.3                           | 1.0                           | 20.0                 |
|                  |                 | 0.6 | 18.0          | 0.6                            | 18.6          | 0.4                           | 1.0                           | 20.0                 |
|                  |                 | 0.5 | 18.0          | 0.5                            | 18.5          | 0.5                           | 1.0                           | 20.0                 |
|                  |                 | 0.4 | 18.0          | 0.4                            | 18.4          | 0.6                           | 1.0                           | 20.0                 |
|                  |                 | 0.3 | 18.0          | 0.3                            | 18.3          | 0.7                           | 1.0                           | 20.0                 |
|                  |                 | 0.2 | 18.0          | 0.2                            | 18.2          | 0.8                           | 1.0                           | 20.0                 |
|                  |                 | 0.1 | 18.0          | 0.1                            | 18.1          | 0.9                           | 1.0                           | 20.0                 |
|                  |                 | 0.0 | 18.0          | 0.0                            | 18.0          | 1.0                           | 1.0                           | 20.0                 |

**Table S2**  $R = 5$  sample preparation for  $\text{Au}_x\text{Ag}_{1-x}$  NPs reduced and stabilized by  $\text{NaBH}_4$ .

| Stocks           | [stock]<br>(mM) | $x$ | Water<br>(mL) | $\text{HAuCl}_4$<br>stock (mL) | Total<br>(mL) | $\text{AgNO}_3$<br>stock (mL) | $\text{NaBH}_4$<br>stock (mL) | Final volume<br>(mL) |
|------------------|-----------------|-----|---------------|--------------------------------|---------------|-------------------------------|-------------------------------|----------------------|
| $\text{HAuCl}_4$ | 5.0             | 1.0 | 18.0          | 1.0                            | 19.0          | 0.0                           | 1.0                           | 20.0                 |
| $\text{AgNO}_3$  | 5.0             | 0.9 | 18.0          | 0.9                            | 18.9          | 0.1                           | 1.0                           | 20.0                 |
| $\text{NaBH}_4$  | 25.0            | 0.8 | 18.0          | 0.8                            | 18.8          | 0.2                           | 1.0                           | 20.0                 |
|                  |                 | 0.7 | 18.0          | 0.7                            | 18.7          | 0.3                           | 1.0                           | 20.0                 |
|                  |                 | 0.6 | 18.0          | 0.6                            | 18.6          | 0.4                           | 1.0                           | 20.0                 |
|                  |                 | 0.5 | 18.0          | 0.5                            | 18.5          | 0.5                           | 1.0                           | 20.0                 |
|                  |                 | 0.4 | 18.0          | 0.4                            | 18.4          | 0.6                           | 1.0                           | 20.0                 |
|                  |                 | 0.3 | 18.0          | 0.3                            | 18.3          | 0.7                           | 1.0                           | 20.0                 |
|                  |                 | 0.2 | 18.0          | 0.2                            | 18.2          | 0.8                           | 1.0                           | 20.0                 |
|                  |                 | 0.1 | 18.0          | 0.1                            | 18.1          | 0.9                           | 1.0                           | 20.0                 |
|                  |                 | 0.0 | 18.0          | 0.0                            | 18.0          | 1.0                           | 1.0                           | 20.0                 |

**Table S3**  $R = 10$  sample preparation for  $\text{Au}_x\text{Ag}_{1-x}$  NPs reduced and stabilized by  $\text{NaBH}_4$ .

| Stocks             | [stock]<br>(mM) | $x$ | Water<br>(mL) | HAuCl <sub>4</sub><br>stock (mL) | Total<br>(mL) | AgNO <sub>3</sub><br>stock (mL) | NaBH <sub>4</sub><br>stock (mL) | Final volume<br>(mL) |
|--------------------|-----------------|-----|---------------|----------------------------------|---------------|---------------------------------|---------------------------------|----------------------|
| HAuCl <sub>4</sub> | 5.0             | 1.0 | 18.0          | 1.0                              | 19.0          | 0.0                             | 1.0                             | 20.0                 |
| AgNO <sub>3</sub>  | 5.0             | 0.9 | 18.0          | 0.9                              | 18.9          | 0.1                             | 1.0                             | 20.0                 |
| NaBH <sub>4</sub>  | 50.0            | 0.8 | 18.0          | 0.8                              | 18.8          | 0.2                             | 1.0                             | 20.0                 |
|                    |                 | 0.7 | 18.0          | 0.7                              | 18.7          | 0.3                             | 1.0                             | 20.0                 |
|                    |                 | 0.6 | 18.0          | 0.6                              | 18.6          | 0.4                             | 1.0                             | 20.0                 |
|                    |                 | 0.5 | 18.0          | 0.5                              | 18.5          | 0.5                             | 1.0                             | 20.0                 |
|                    |                 | 0.4 | 18.0          | 0.4                              | 18.4          | 0.6                             | 1.0                             | 20.0                 |
|                    |                 | 0.3 | 18.0          | 0.3                              | 18.3          | 0.7                             | 1.0                             | 20.0                 |
|                    |                 | 0.2 | 18.0          | 0.2                              | 18.2          | 0.8                             | 1.0                             | 20.0                 |
|                    |                 | 0.1 | 18.0          | 0.1                              | 18.1          | 0.9                             | 1.0                             | 20.0                 |
|                    |                 | 0.0 | 18.0          | 0.0                              | 18.0          | 1.0                             | 1.0                             | 20.0                 |

**Table S4** Turnover frequency (TOF/h<sup>-1</sup>) of Au<sub>x</sub>Ag<sub>1-x</sub>NPs.

| $x$ | R = 2         | R = 5        | R = 10         |
|-----|---------------|--------------|----------------|
| 1.0 | 605 ± 10      | 620 ± 40     | 590 ± 10       |
| 0.9 | 2,926 ± 50    | 1,310 ± 50   | 2,460 ± 70     |
| 0.8 | 4,010 ± 200   | 5,400 ± 330  | 6,500 ± 230    |
| 0.7 | 8,830 ± 480   | 8,600 ± 170  | 9,690 ± 1240   |
| 0.6 | 11,500 ± 740  | 7,980 ± 40   | 9,160 ± 660    |
| 0.5 | 8,180 ± 50    | 9,500 ± 240  | 12,070 ± 1,370 |
| 0.4 | 7,930 ± 1,190 | 8,840 ± 60   | <sup>a</sup>   |
| 0.3 | 12,160 ± 230  | 10,450 ± 390 | <sup>a</sup>   |
| 0.2 | 8,590 ± 1,100 | 9,600 ± 830  | <sup>a</sup>   |
| 0.1 | 8,280 ± 210   | 9,000 ± 410  | <sup>a</sup>   |
| 0.0 | 2,370 ± 70    | <sup>a</sup> | <sup>a</sup>   |

<sup>a</sup> Catalytic activity was not assessed for these samples due to the presence of black precipitate, evidence of NP aggregation.

**Table S5** Apparent catalytic rate ( $k_{app}/s^{-1}$ ) and turnover frequency (TOF/h<sup>-1</sup>) for the recyclability study performed using the R = 2,  $x$  = 0.3 bimetallic Au<sub>x</sub>Ag<sub>1-x</sub>NPs.

| Cycle                       | $k_{app}$ (s <sup>-1</sup> ) | TOF (h <sup>-1</sup> ) |
|-----------------------------|------------------------------|------------------------|
| 1                           | $1.87 \times 10^{-1}$        | 12,260                 |
| 2 (1 <sup>st</sup> recycle) | $9.77 \times 10^{-2}$        | 6,030                  |
| 3 (2 <sup>nd</sup> recycle) | $7.22 \times 10^{-2}$        | 4,490                  |
| 4 (3 <sup>rd</sup> recycle) | $4.17 \times 10^{-2}$        | 2,880                  |
| 5 (4 <sup>th</sup> recycle) | $3.30 \times 10^{-2}$        | 2,120                  |
| 6 (5 <sup>th</sup> recycle) | $2.68 \times 10^{-2}$        | 1,570                  |

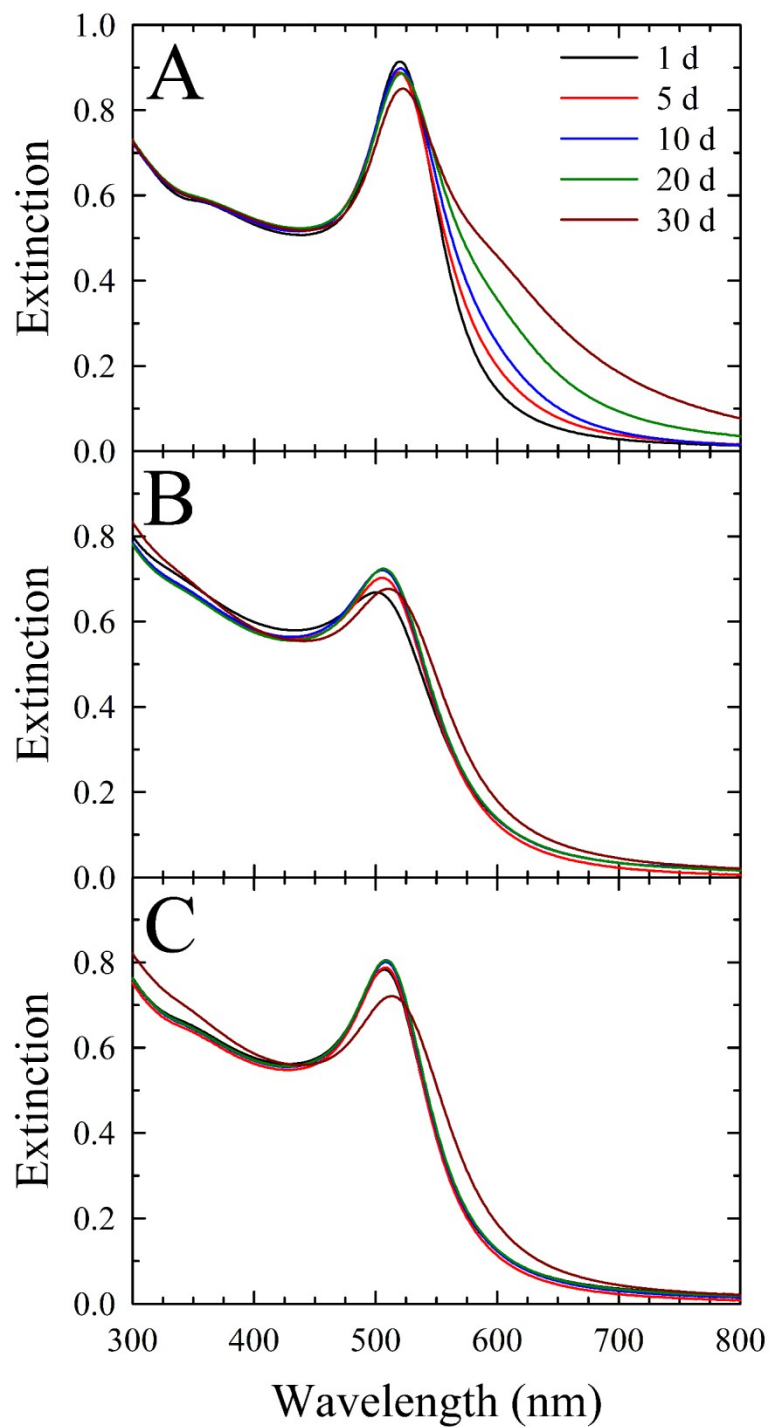

**Fig. S1** Stability of AuNPs ( $\text{Au}_x\text{Ag}_{1-x}\text{NPs}$  for  $x = 1.0$ ) over 30 days of storage as monitored using UV-vis spectrophotometry. Panels A, B, and C correspond to R values of 2, 5, and 10, respectively. The legend in panel A applies to all panels.

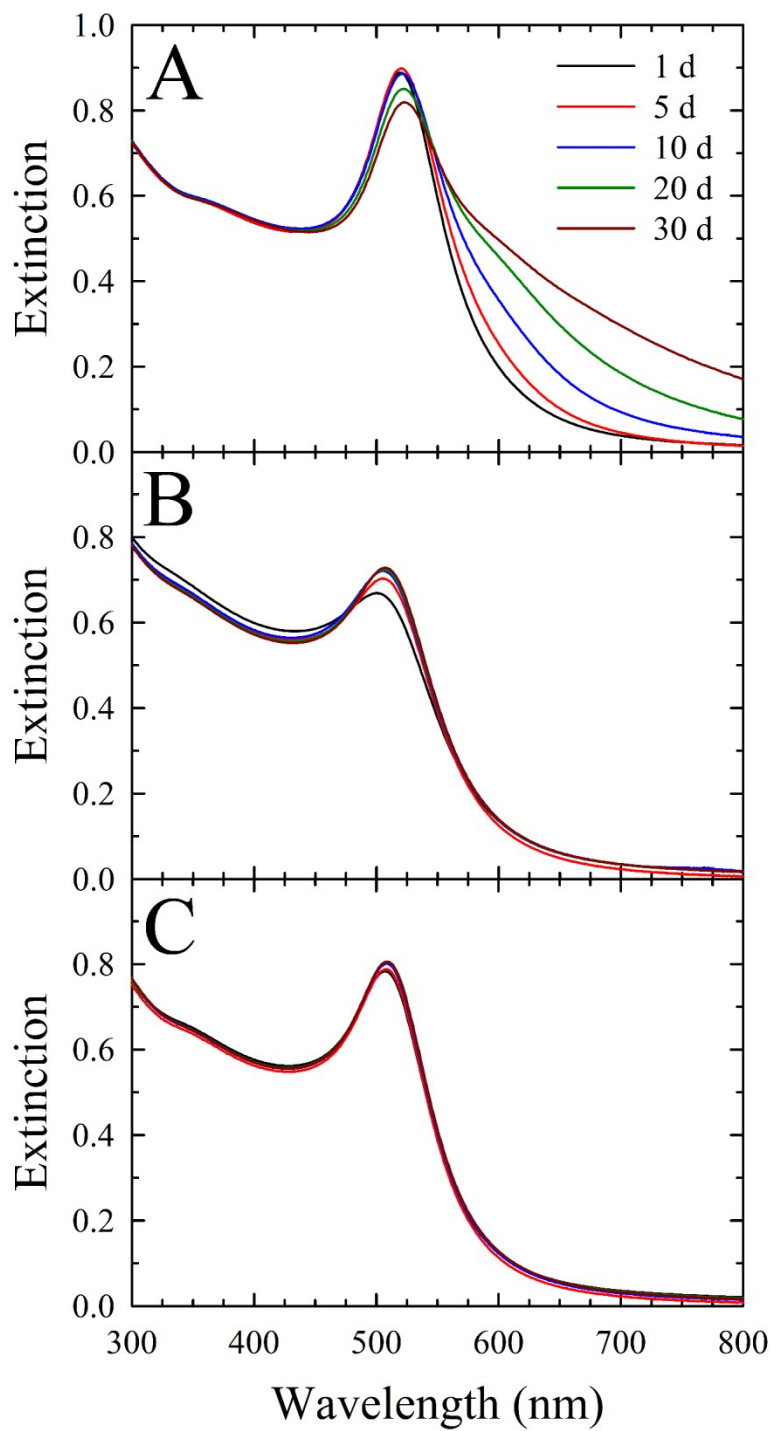

**Fig. S2** Stability of  $\text{Au}_x\text{Ag}_{1-x}\text{NPs}$  ( $x = 0.9$ ) over 30 days of storage as followed by UV-vis spectrophotometry. Panels A, B, and C correspond to R values of 2, 5, and 10, respectively. The legend in panel A applies to all panels.

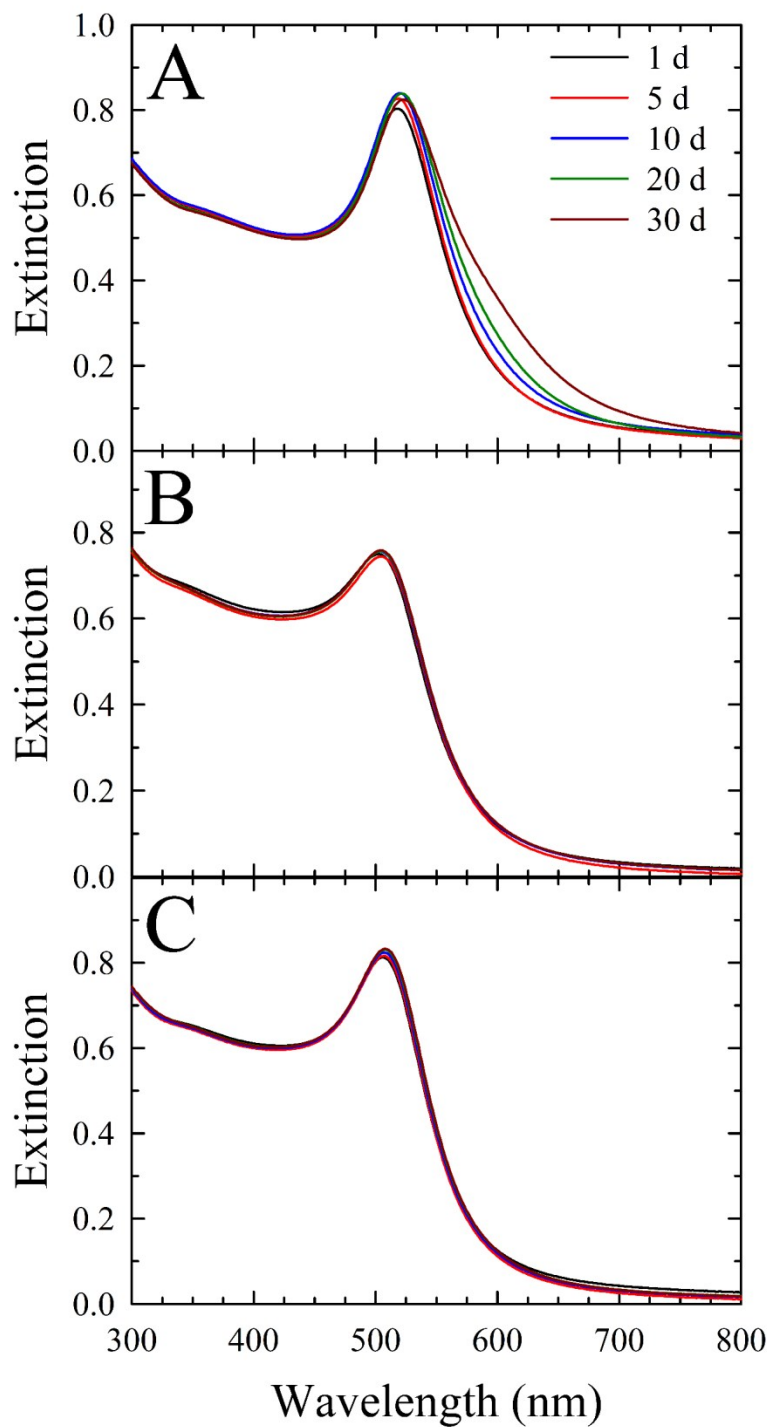

**Fig. S3** Stability of Au<sub>x</sub>Ag<sub>1-x</sub>NPs ( $x = 0.8$ ) over 30 days of storage, interrogated using UV-vis spectrophotometry. Panels A, B, and C correspond to R values of 2, 5, and 10, respectively. The legend in panel A applies to all panels.

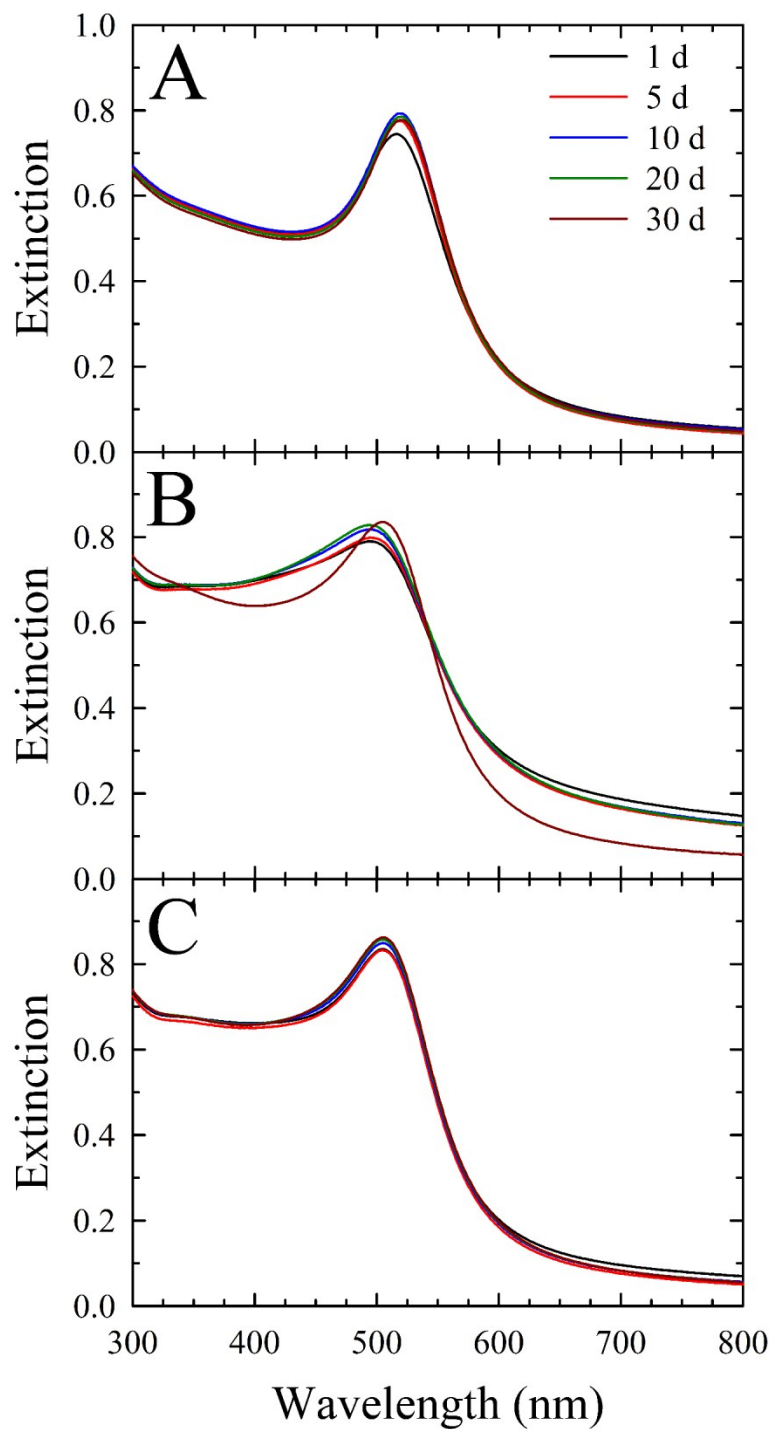

**Fig. S4** Stability of  $\text{Au}_x\text{Ag}_{1-x}$  NPs ( $x = 0.7$ ) over 30 days of storage as monitored using UV-vis spectrophotometry. Panels A, B, and C correspond to R values of 2, 5, and 10, respectively. The legend in panel A applies to all panels.

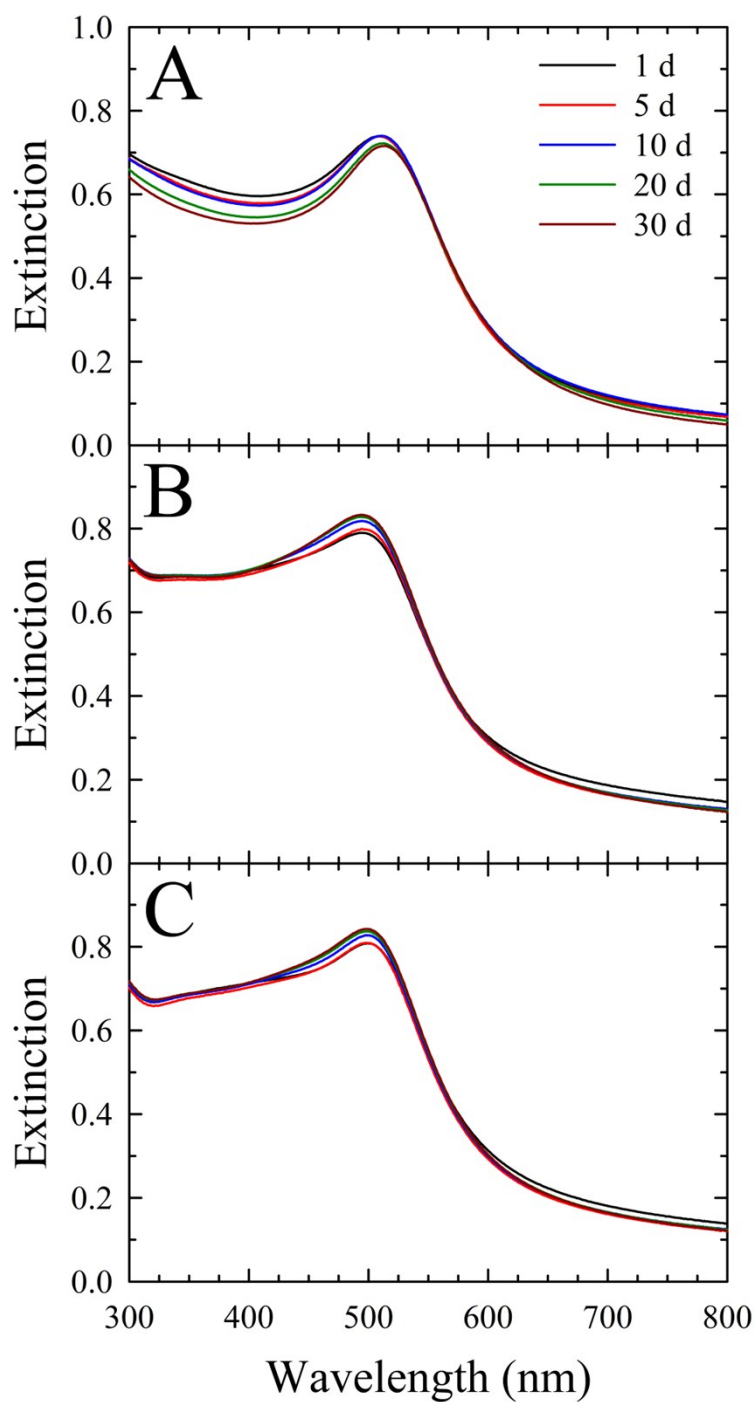

**Fig. S5** Stability of  $\text{Au}_x\text{Ag}_{1-x}\text{NPs}$  ( $x = 0.6$ ) over 30 days of storage as measured using UV-vis spectrophotometry. Panels A, B, and C correspond to R values of 2, 5, and 10, respectively. The legend in panel A applies to all panels.



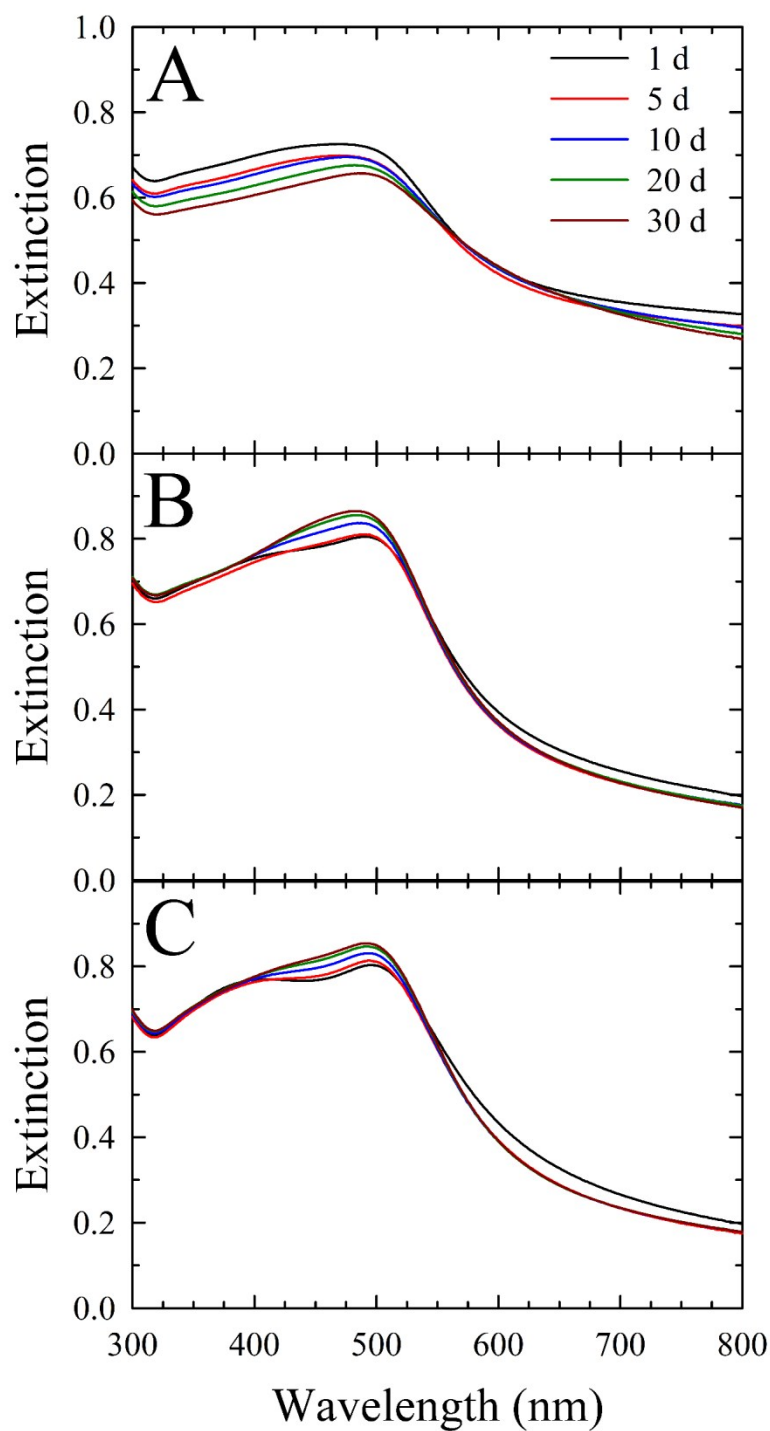

**Fig. S6** Stability of  $\text{Au}_x\text{Ag}_{1-x}\text{NPs}$  ( $x = 0.5$ ) over 30 days of storage, tracked using UV-vis spectrophotometry. Panels A, B, and C correspond to R values of 2, 5, and 10, respectively. The legend in panel A applies to all panels.

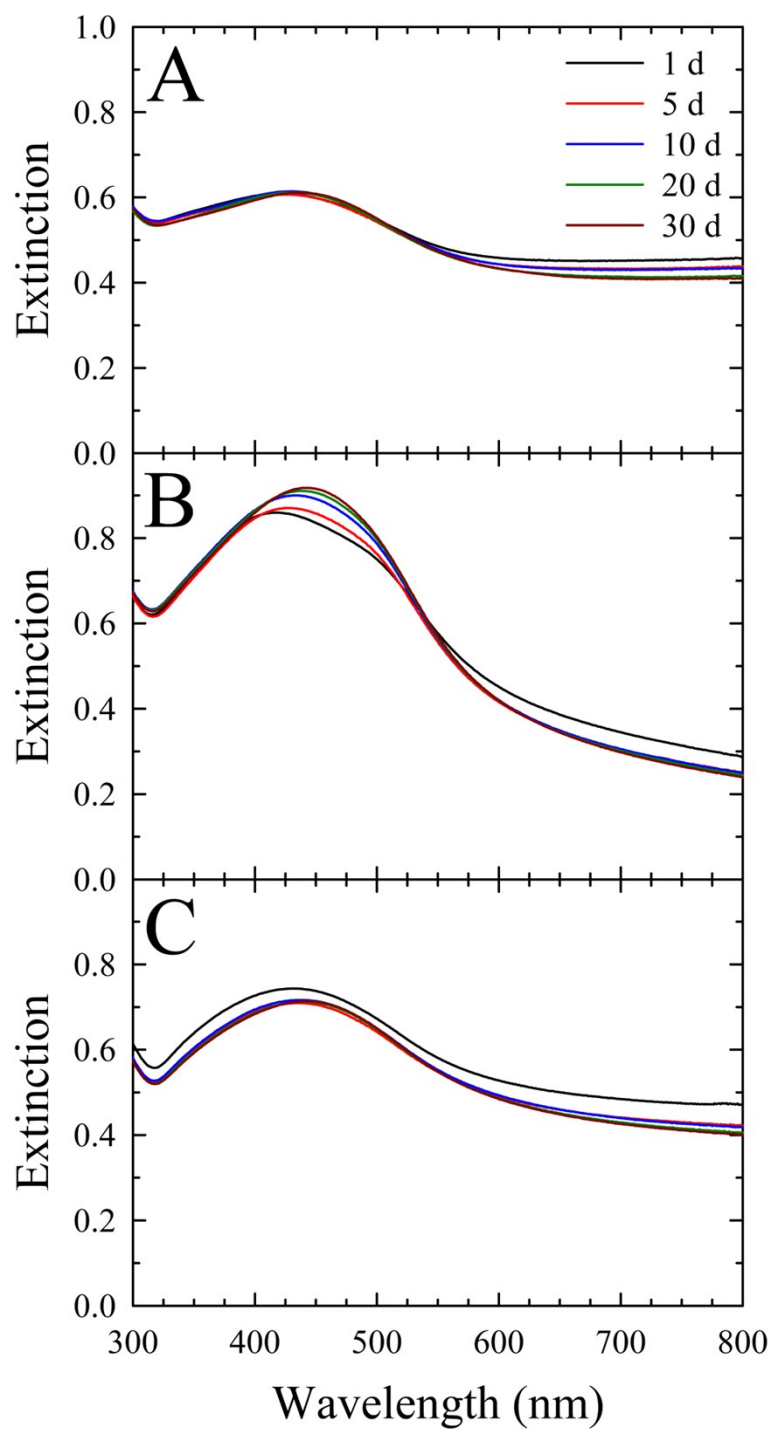

**Fig. S7** Stability of Au<sub>x</sub>Ag<sub>1-x</sub>NPs ( $x = 0.4$ ) over 30 days of storage, followed by UV-vis spectrophotometry. Panels A, B, and C correspond to R values of 2, 5, and 10, respectively. The legend in panel A applies to all panels.

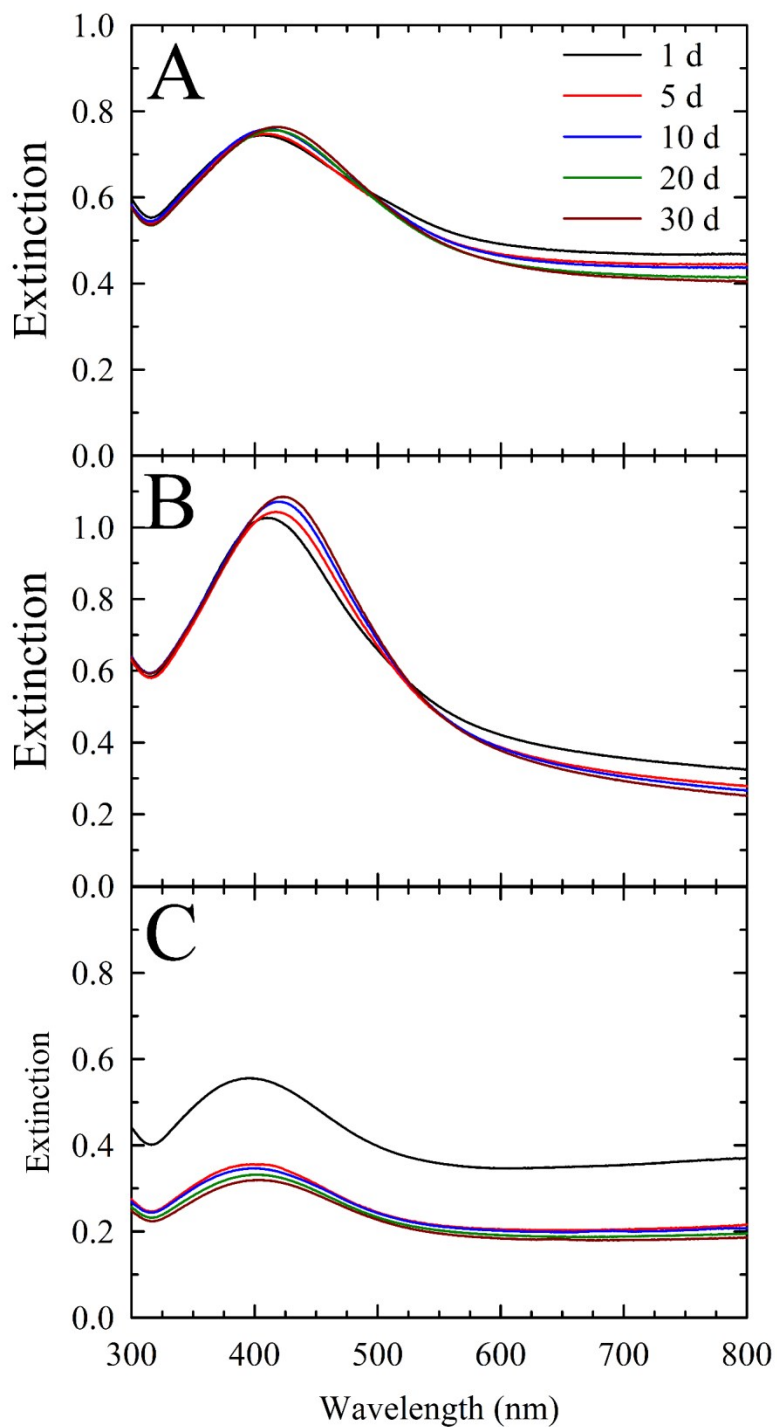

**Fig. S8** Stability of  $\text{Au}_x\text{Ag}_{1-x}\text{NPs}$  ( $x = 0.3$ ) followed over 30 days of storage using UV-vis spectrophotometry. Panels A, B, and C correspond to R values of 2, 5, and 10, respectively. The legend in panel A applies to all panels.

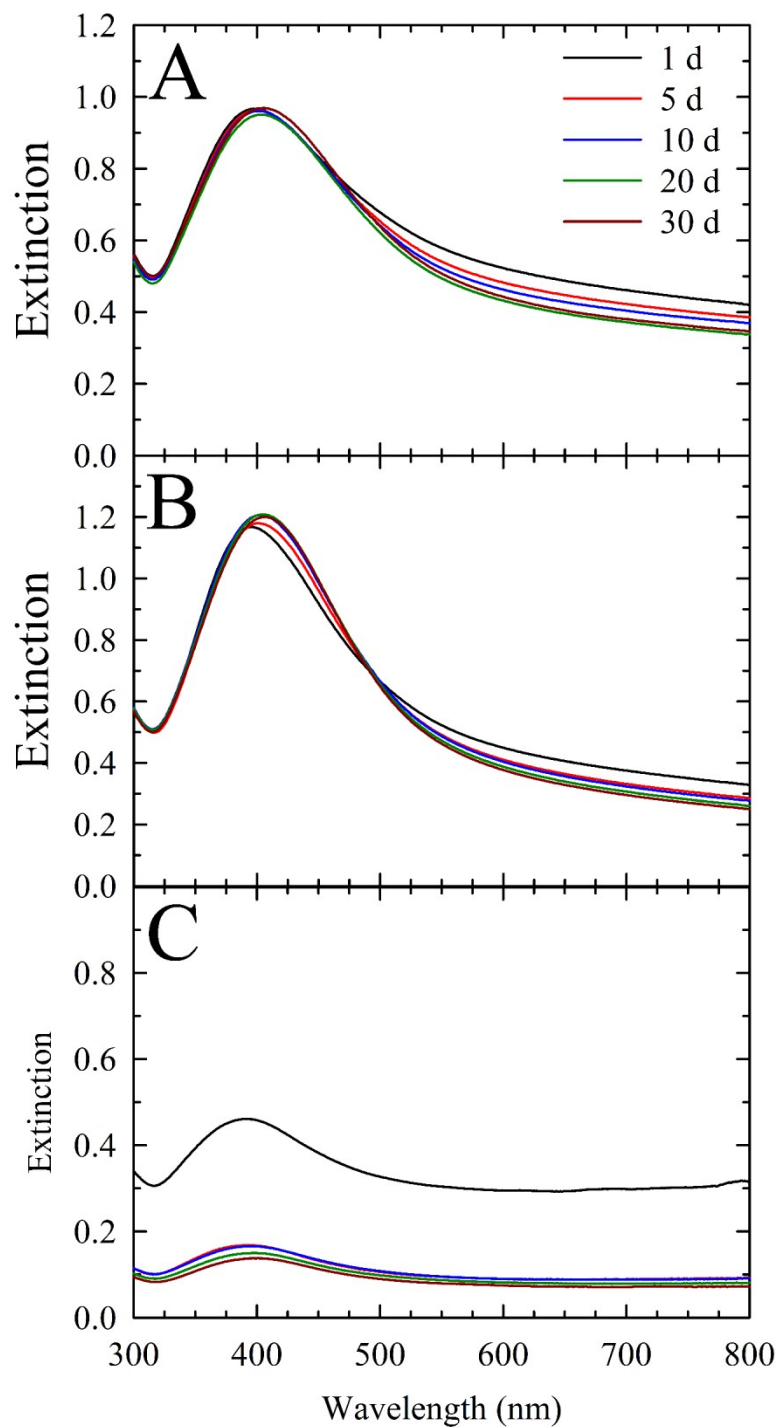

**Fig. S9** Stability of  $\text{Au}_x\text{Ag}_{1-x}\text{NPs}$  ( $x = 0.2$ ) evaluated over 30 days of storage with UV-vis spectrophotometry. Panels A, B, and C correspond to R values of 2, 5, and 10, respectively. The legend in panel A applies to all panels.

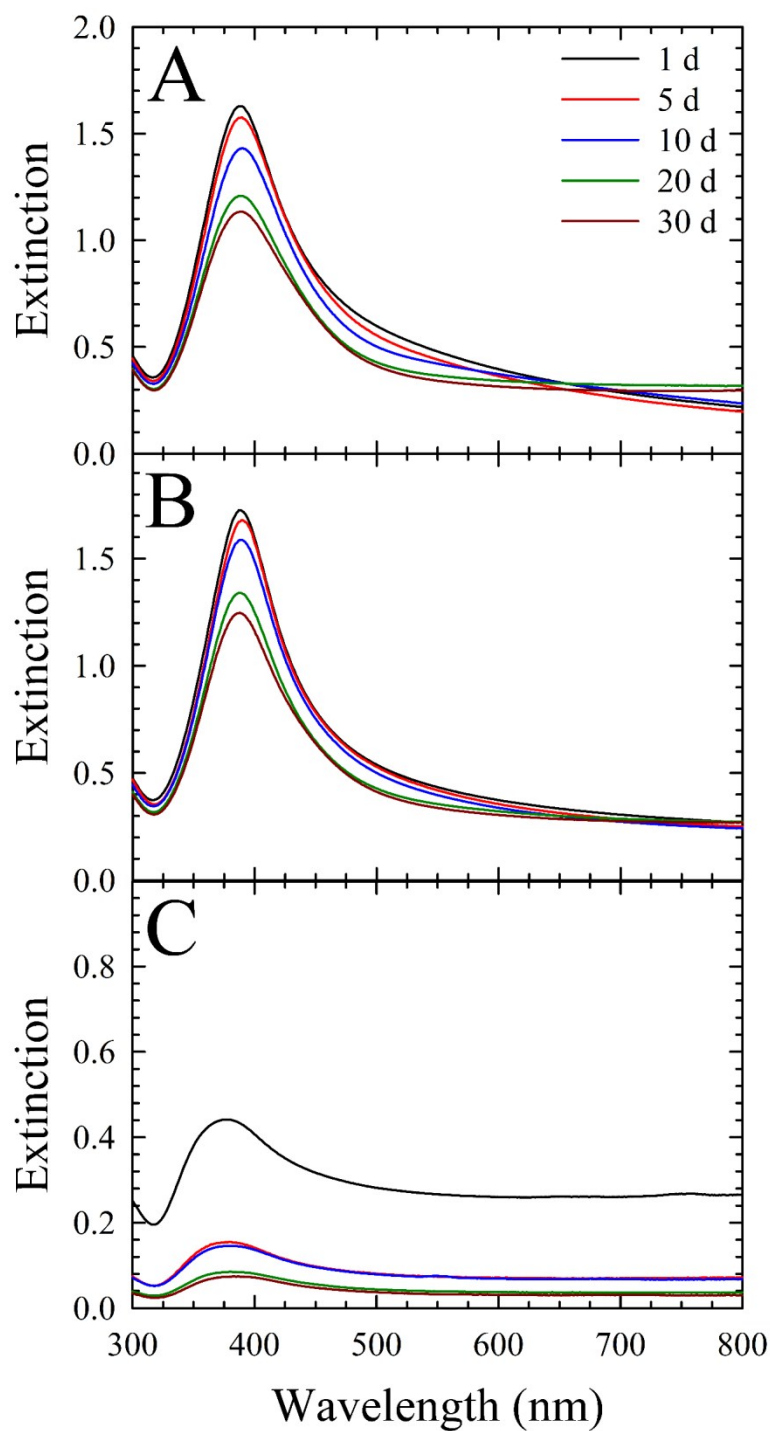

**Fig. S10** Stability of  $\text{Au}_x\text{Ag}_{1-x}\text{NPs}$  ( $x = 0.1$ ) investigated over 30 days of storage with UV-vis spectrophotometry. Panels A, B, and C correspond to R values of 2, 5, and 10, respectively. The legend in panel A applies to all panels.

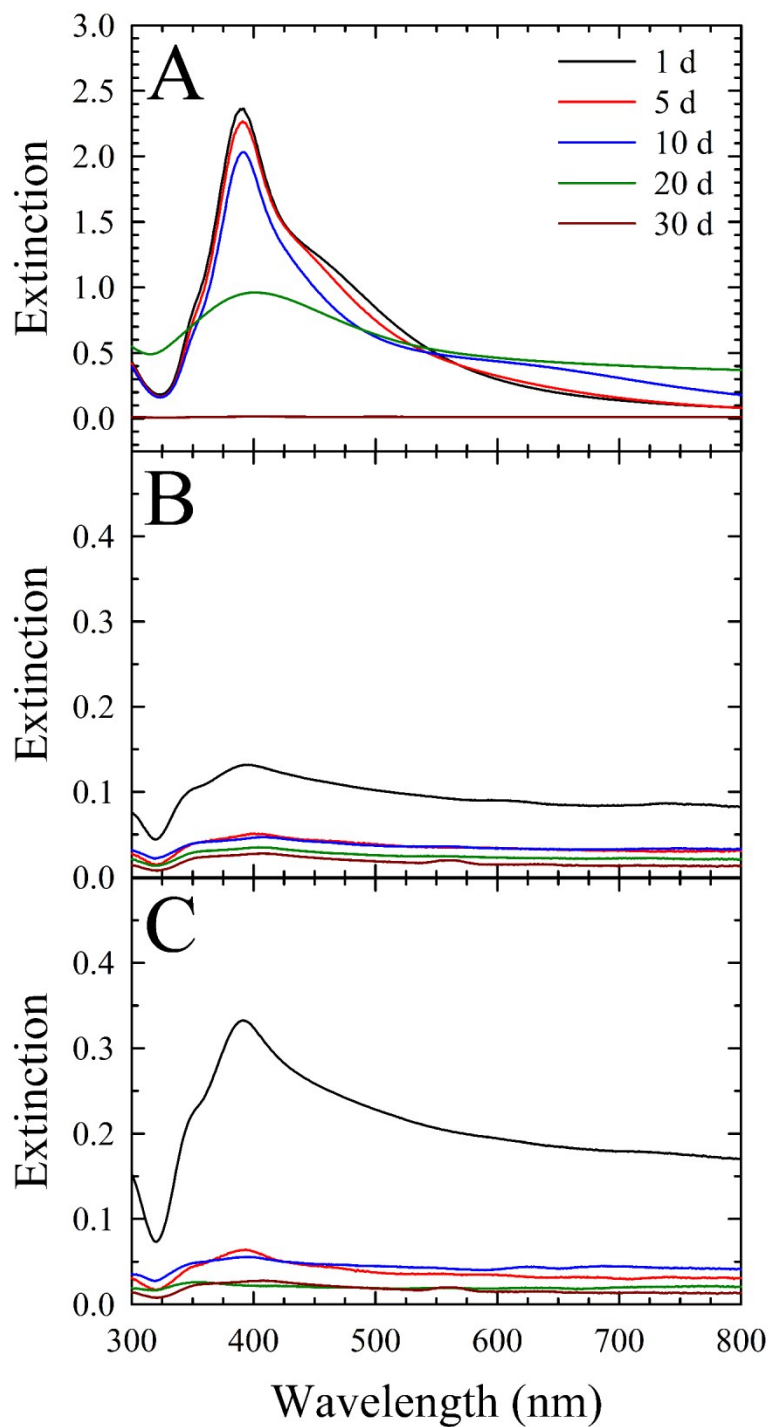

**Fig. S11** Stability of AgNPs ( $\text{Au}_x\text{Ag}_{1-x}\text{NPs}$  for  $x = 0.0$ ), monitored over 30 days of storage using UV-vis spectrophotometry. Panels A, B, and C correspond to R values of 2, 5, and 10, respectively. The legend in panel A applies to all panels.

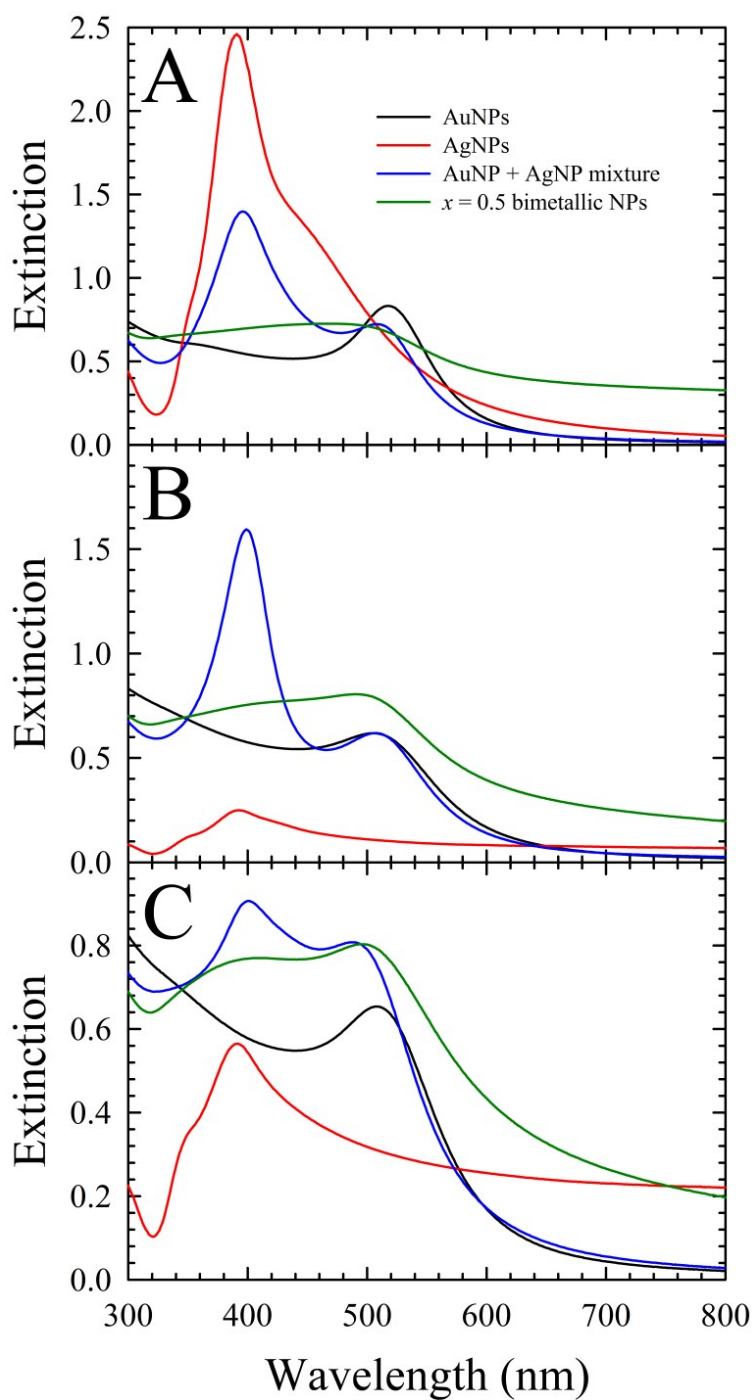

**Fig. S12** Comparison of AuNPs, AgNPs, a 1:1 AuNP:AgNP mixture, and bimetallic  $\text{Au}_x\text{Ag}_{1-x}$  NPs ( $x = 0.5$ ). Shown are A)  $R = 2$ , B)  $R = 5$ , and C)  $R = 10$ , where  $R$  equals the molar ratio of  $\text{NaBH}_4$  to metal. The total metal (Au + Ag) concentration is 0.25 mM for all samples.

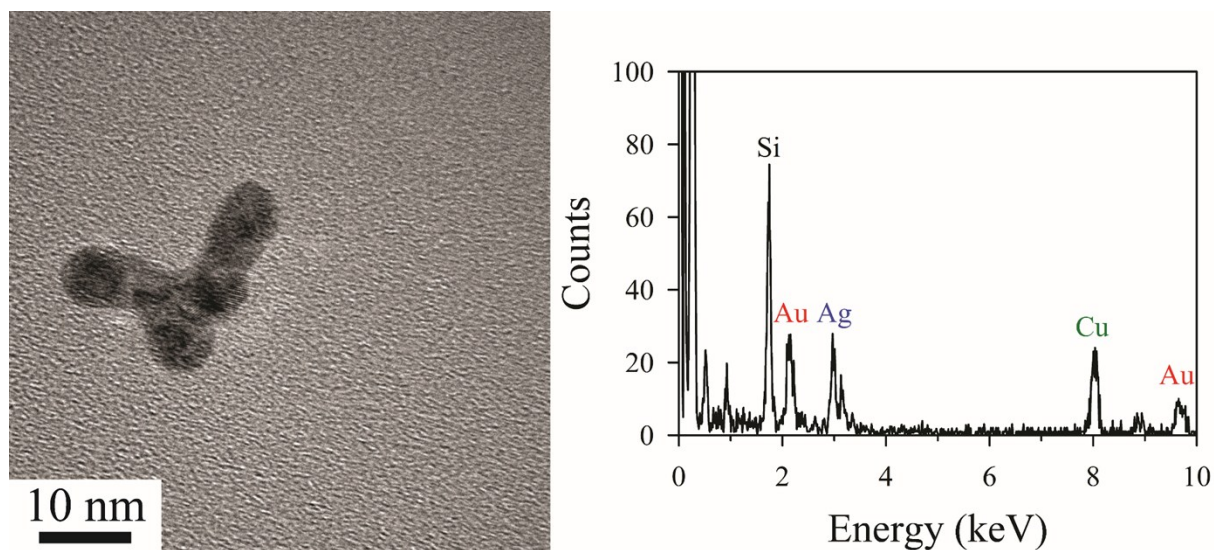

**Fig. S13** (Left) A HR-TEM image showing a  $R = 5$ ,  $x = 0.5$  bimetallic  $\text{Au}_x\text{Ag}_{1-x}\text{NP}$  and (right) the corresponding EDS spectrum confirming the presence of both gold and silver within the nanostructure. Copper is typically observed when using copper TEM grids, but the presence of silicon is more likely attributed to a small amount of contamination on the TEM grid, as no glassware or silicon-containing reagents were used in the preparation of these bimetallic NPs.



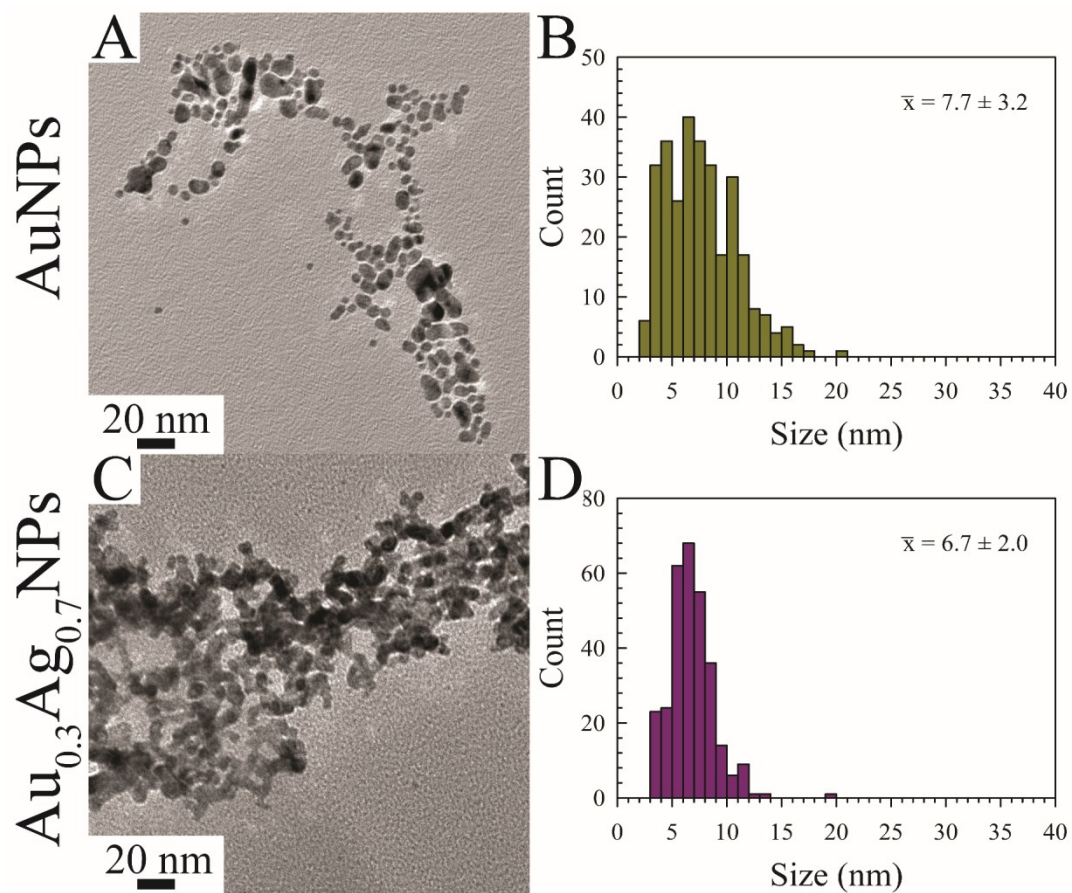

**Fig. S14** Representative TEM images and size distribution histograms for  $R = 5$   $\text{Au}_x\text{Ag}_{1-x}\text{NPs}$  where (A, B)  $x = 1.0$  and (C, D)  $x = 0.3$ . Note the apparent formation of metal networks and particle ripening (sizes of metal networks were ignored during particle size analysis).

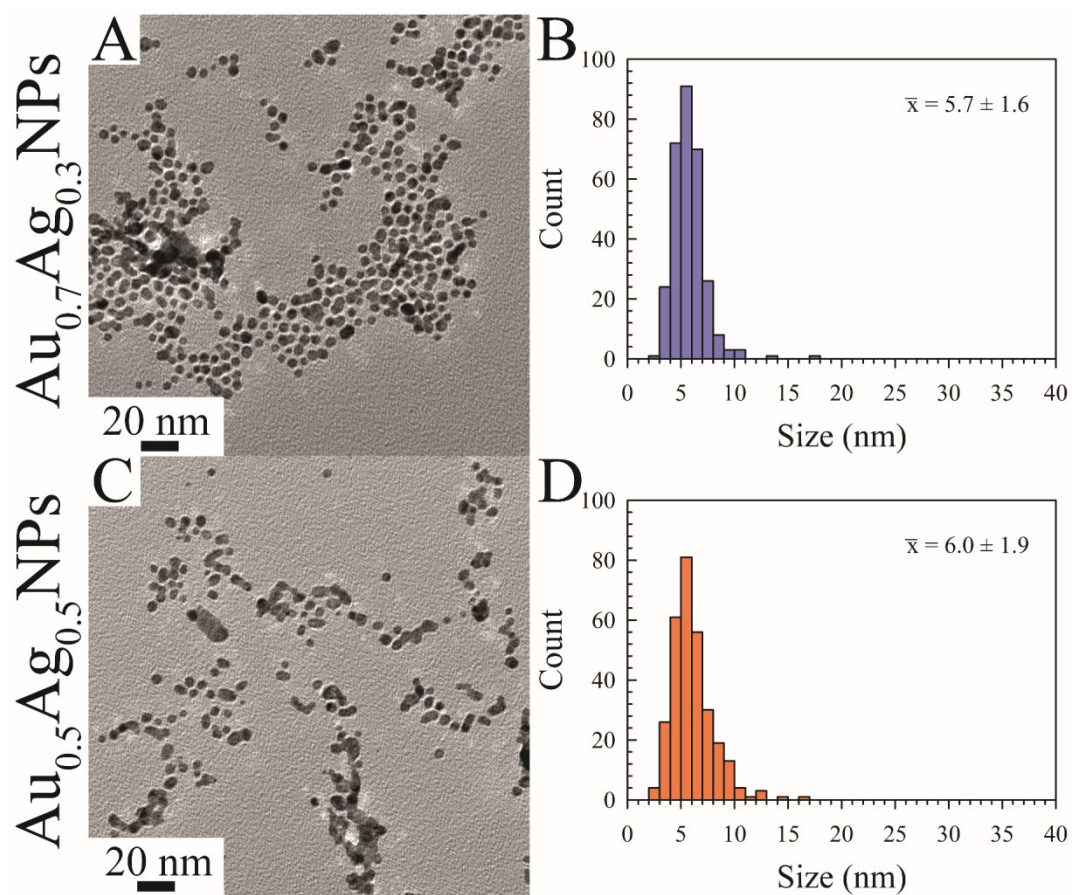

**Fig. S15** Representative TEM images and size distribution histograms for  $R = 10$   $\text{Au}_x\text{Ag}_{1-x}\text{NPs}$ , for (A, B)  $x = 0.7$  and (C, D)  $x = 0.5$ . Note the occasional large nanoparticle or aggregation of nanoparticles, particularly in panel C.

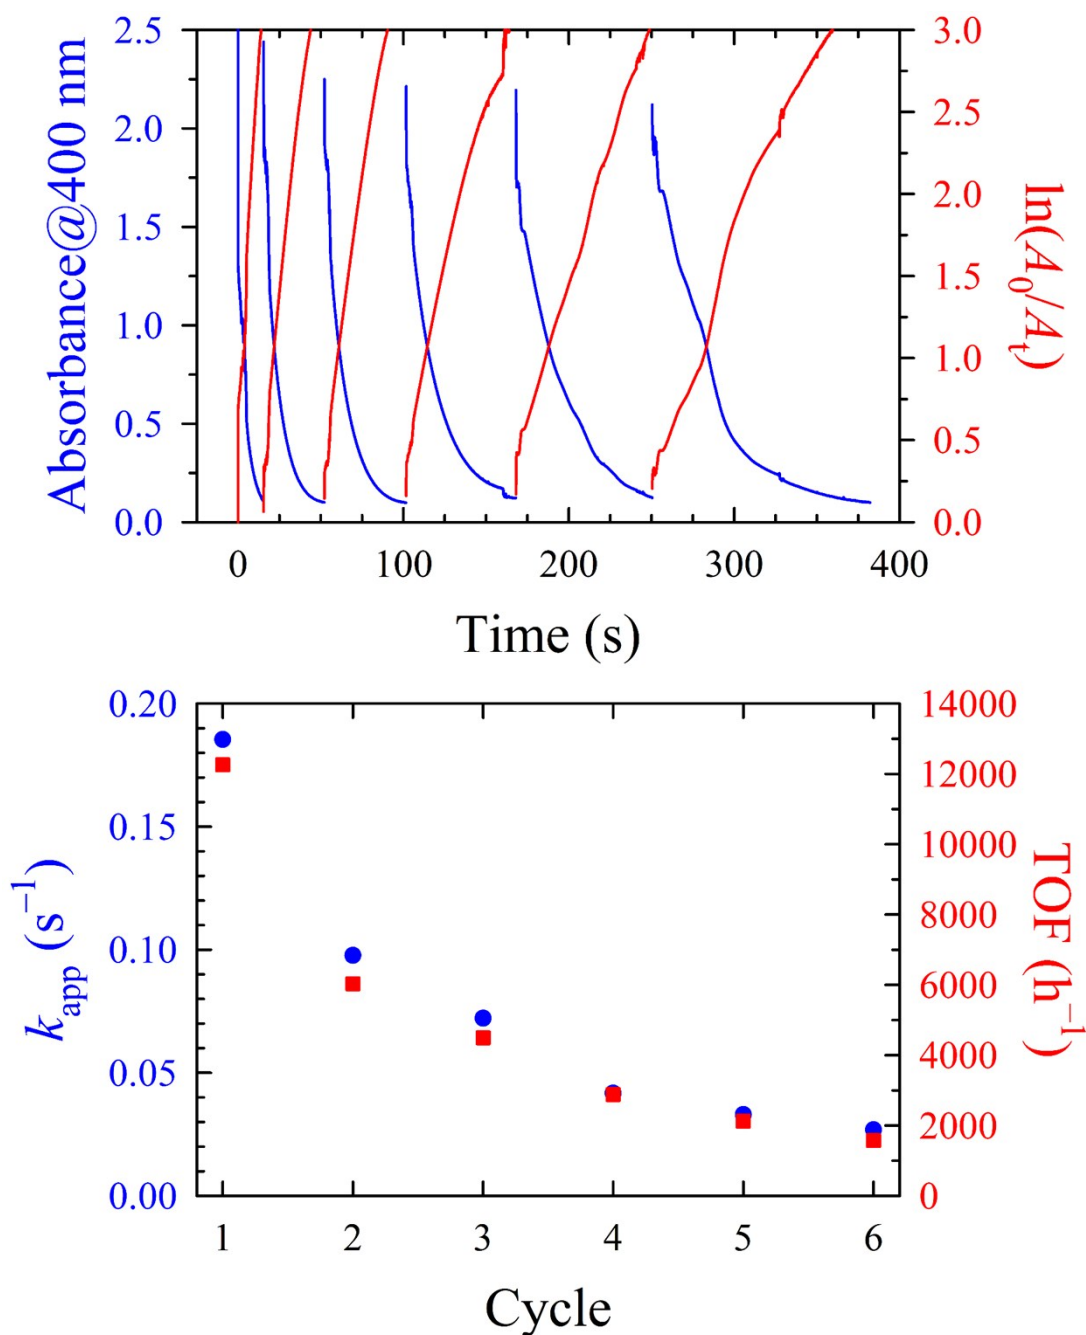

**Fig. S16** Assessment of the recyclability of the  $R = 2$ ,  $x = 0.3$  bimetallic  $Au_xAg_{1-x}$ NPs. Top) Absorbance spectra (blue, left axis) and rate plots (red, right axis) for each cycle versus time, with considerable slowing of the reaction rate observed in later cycles. The duration of time between cycles when the cuvette was mixed outside of the instrument has been removed for clarity. Bottom) The  $k_{app}$  (blue, left axis) and TOF (red, right axis) values for each cycle, showing exponential decay in activity with sequential cycles.
